# Supplementary material for: Current self-complianced and self-rectifying resistive switching in Ag-electroded single Na-doped ZnO nanowires
Source: Royal Society of Chemistry journal article supplement (doi:10.1039/c3nr00027c), 2013-01-01
Supplement: c3nr00027c.pdf [file c3nr00027c.pdf]

## Supplementary Information

### Current self-complianced and self-rectifying resistive

### switching in Ag-electroded single Na-doped ZnO nanowire

Jing Qi<sup>1,\*,†</sup>, Jian Huang<sup>2,\*,†</sup>, Dennis Paul<sup>3</sup>, Jingjian Ren<sup>2</sup>, Sheng Chu<sup>2</sup>, Jianlin Liu<sup>2,†</sup>

<sup>1</sup>The Key Laboratory for Magnetism and Magnetic Materials of MOE, Department of Physics, School of Physical Science and Technology, Lanzhou University, Lanzhou, 730000, China

<sup>2</sup>Quantum Structures Laboratory, Department of Electrical Engineering, University of California, Riverside, California, 92521, USA

<sup>3</sup>Physical Electronics, 18725 Lake Drive East, Chanhassen, MN 55317, USA

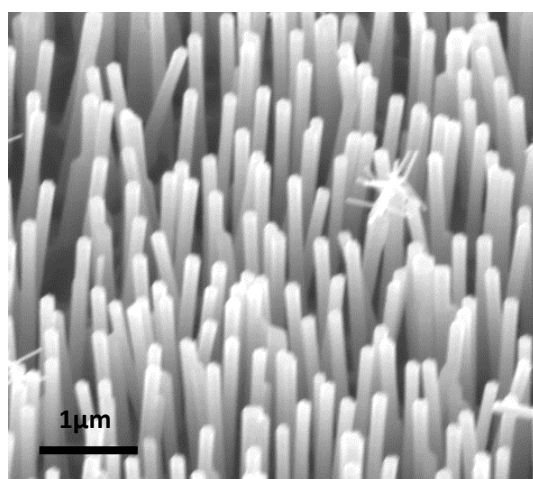

Fig.S1 Tilted SEM image of as-grown undoped ZnO nanowires. The nanowires tend to grow vertically on the substrate.

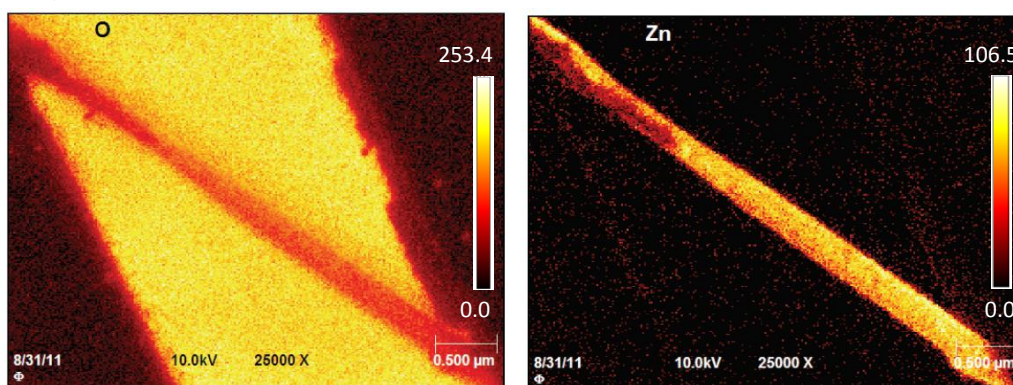

Fig.S2 AES O and Zn map of ZnO nanowire device after 1nm material on the surface was sputtered away to exclude the effect of possible contamination on mapping.

\* These authors had equal contribution to this work.

† Corresponding authors. Email: [qijing@lzu.edu.cn](mailto:qijing@lzu.edu.cn), [jianlin@ee.ucr.edu](mailto:jianlin@ee.ucr.edu).

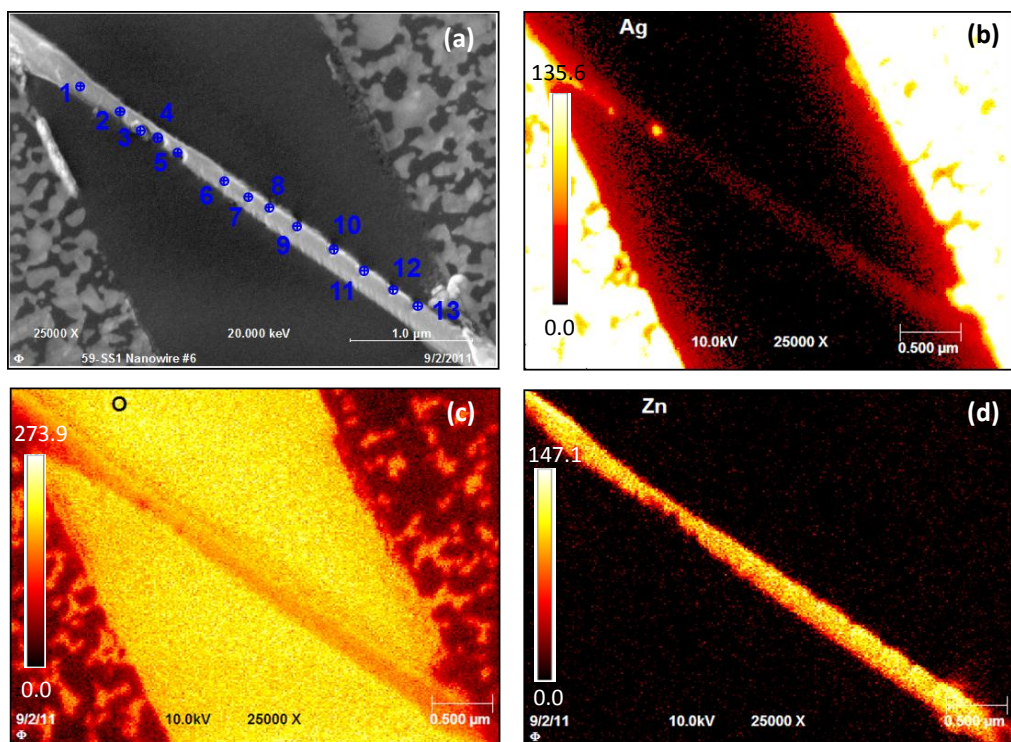

Fig.S3 (a) SEM image, (b)-(d) Ag, O and Zn map for the measured ZnO nanowire resistive switching device after 50nm material on the surface was sputtered away.

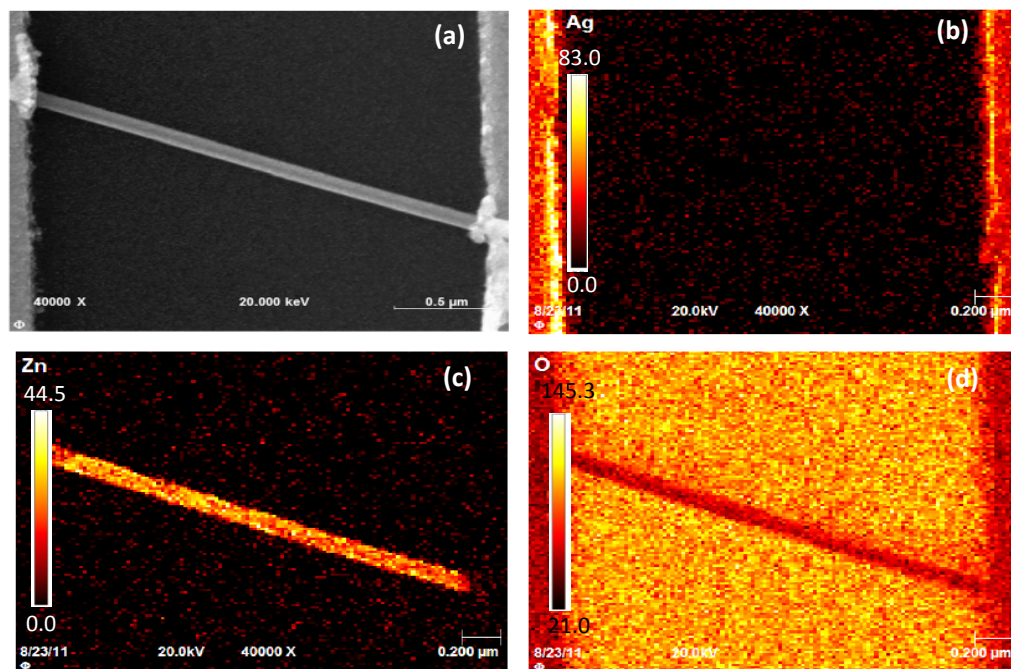

Fig.S4 (a) Typical SEM image and (b)-(d) Ag, Zn, O maps for ZnO nanowire without going through *I-V* characterizations.

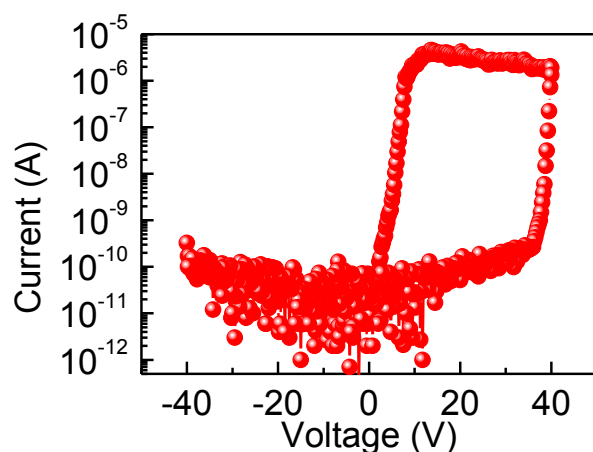

Fig.S5  $I$ - $V$  characteristics for Na-doped nanowire when the first voltage sweeping range is from 0V to -40V.

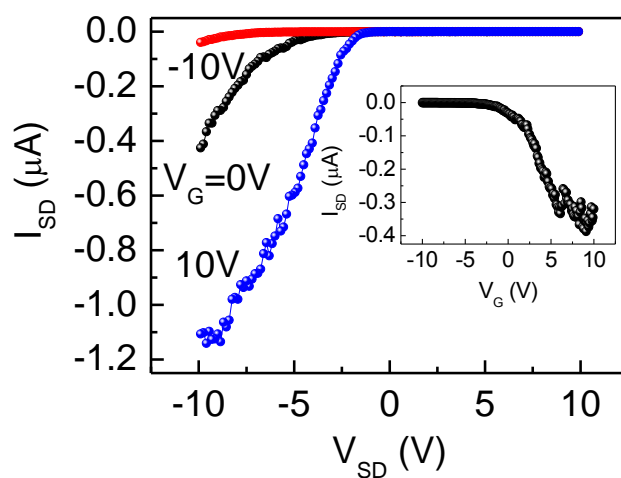

Fig.S6  $I_D$ - $V_D$ , inset:  $I_D$ - $V_G$  results for the FET device fabricated with Na-doped ZnO nanowire, in which Al contact on the back of  $\text{SiO}_2/\text{Si}$ -substrate was utilized as gate.

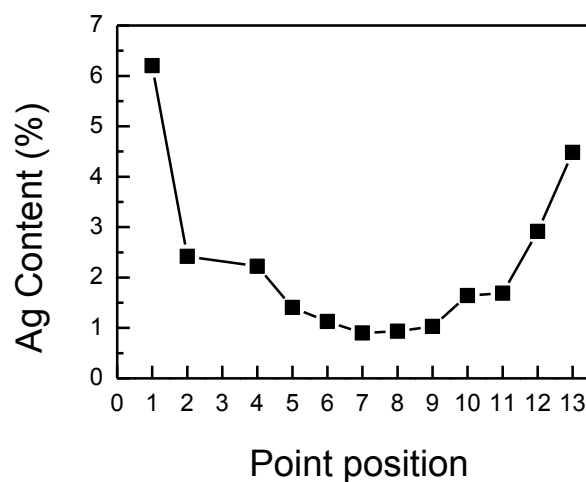

Fig.S7 Ag contents along the Na-doped nanowire after  $I$ - $V$  characteristics with a layer of 50nm sputtered away. Part of these Ag atoms should be doped into ZnO nanowire as p-type dopant besides at the position of white spots.
